# Supplementary material
Source: Research Square preprint supplement (doi:10.21203/rs.3.rs-9397427/v1)
Supplement: Supplementary file 1 [file 21aacf9697f3a476e8698b46.docx]

Supplementary Table S 1. Distribution of psychomotor development levels by community

| **Community** | **Level of psychomotor development** f **(%)** | | | | |
| --- | --- | --- | --- | --- | --- |
| **Alert** | **Medium** | **Medium-High** | **High** | **Total** |
| Cariamanga | 7 (23.3%) | 18 (60.0%) | 5 (16.7%) | 0 (0.0%) | 30 |
| Colaisaca | 2 (18.2%) | 8 (72.7%) | 1 (9.1%) | 0 (0.0%) | 11 |
| Lucero | 1 (7.7%) | 6 (46.2%) | 5 (38.5%) | 1 (7.7%) | 13 |
| Quilanga | 4 (28.6%) | 8 (57.1%) | 2 (14.3%) | 0 (0.0%) | 14 |
| Chingulle | 2 (66.7%) | 0 (0.0%) | 1 (33.3%) | 0 (0.0%) | 3 |
| Gonzanamá | 10 (35.7%) | 12 (42.9%) | 6 (21.4%) | 0 (0.0%) | 28 |
| Nambacola | 6 (24.0%) | 14 (56.0%) | 5 (20.0%) | 0 (0.0%) | 25 |
| Sacapalca | 1 (20%) | 2 (40%) | 2 (40%) | 0 (0.0%) | 5 |
| Changaimina | 1 (11.1%) | 3 (33.3%) | 5 (55.6%) | 0 (0.0%) | 9 |
| **Total diagnosis** | 34 (24.6%) | 71 (51.4%) | 32 (23.2%) | 1 (0.7%) | 138 (100%) |

4 Results from communities with small sample sizes should be interpreted with caution
